# Supplementary material for: A novel dictionary-based approach for missing sample recovery of signals in manifold
Source: Springer Nature journal article supplement (doi:10.1007/s11760-016-0934-1), 2016-08-09
Supplement: 11760_2016_934_MOESM1_ESM.pdf [file 11760_2016_934_MOESM1_ESM.pdf]

# A Novel Dictionary Based Approach for Missing Sample Recovery of Signals in Manifold

Baburaj M. · Sudhish N George

## Projection Operator

$$\mathcal{P}_{\mathcal{M}}(x) = \min_{\tilde{x} \in \mathcal{M}} \|\tilde{x} - x\| \quad (1)$$

Informally, given an arbitrary vector  $x \in \mathbb{R}^N$ , the operator  $\mathcal{P}_{\mathcal{M}}(x)$  returns the point on the manifold  $\mathcal{M}$  that is closest to  $x$ , where closeness is measured in terms of the Euclidean norm. The projection operator  $\mathcal{P}_{\mathcal{M}}(\cdot)$  as euclidean projection onto  $\mathcal{M}$ . Note that in a number of applications,  $\mathcal{P}_{\mathcal{M}}(\cdot)$  as euclidean projection onto  $\mathcal{M}$  may be quite difficult to compute exactly. Therefore, we define  $\gamma$ -approximate projection operator as

$$\tilde{x} = \mathcal{P}_{\mathcal{M}}^{\gamma}(x) \implies \tilde{x} \in \mathcal{M}, \text{ and } \|\tilde{x} - x\| \leq \|\mathcal{P}_{\mathcal{M}}(x) - x\| + \gamma \quad (2)$$

so that  $\mathcal{P}_{\mathcal{M}}^{\gamma}(\cdot)$  yields a vector  $\tilde{x} \in \mathcal{M}$  that approximately minimizes the squared distance from  $x$  to  $\mathcal{M}$ .

## Graident Operator

Let  $\tilde{x} \in \mathbb{R}^N$  be the signal having arbitrary missing samples. The original clean signal  $x \in \mathcal{M}$ , so that, corrupted signal can be modelled as

$$\tilde{x} = x + e, \quad x \in \mathcal{M} \quad (3)$$

where  $e$  is the error due to missing samples. In worst case, noisy version of signal can be modelled as,

$$\tilde{x}_{\eta} = x + e + \eta, \quad x \in \mathcal{M} \quad (4)$$

where  $\eta$  is the additive white Gaussian noise present in the signal. If we project clean signal  $x$  onto  $\mathcal{M}$ , the result is signal  $x$  itself, whereas the projection of  $\tilde{x}$  yields  $\hat{x} = \mathcal{P}_{\mathcal{M}}(\tilde{x})$ ,  $\hat{x} \in \mathcal{M}$  &  $\|\tilde{x} - \hat{x}\|_2 \leq \epsilon$ , where  $\epsilon$  is a positive quantity. Let  $p_i \in \mathbb{I}$  for  $i = 1 \dots M$  are the locations of  $M$  missing samples. For each missing positions at  $k^{th}$  iteration we form two signals.

we form two signals.

$$\hat{x}_{+\delta}^{(k)}(n) = \begin{cases} \hat{x}^{(k)}(n) + \Delta & \text{if } n = p_i \\ \hat{x}^{(k)}(n) & \text{if } n \neq p_i. \end{cases}$$

$$\hat{x}_{-\delta}^{(k)}(n) = \begin{cases} \hat{x}^{(k)}(n) - \Delta & \text{if } n = p_i \\ \hat{x}^{(k)}(n) & \text{if } n \neq p_i. \end{cases}$$

where  $\Delta$  is the step size. The projection of these signals onto manifold  $\mathcal{M}$  is calculated as

$$\hat{x}_{+\delta}^{(k)} = \mathcal{P}_{\mathcal{M}}(\hat{x}_{+\delta}^{(k)})$$

$$\hat{x}_{-\delta}^{(k)} = \mathcal{P}_{\mathcal{M}}(\hat{x}_{-\delta}^{(k)})$$

The distance between the projected signal and original signal is measured as

$$d_1^{(k)} = \|\hat{x}_{+\delta}^{(k)} - \hat{x}_{+\delta}^{(k)}\|_2$$

$$d_2^{(k)} = \|\hat{x}_{-\delta}^{(k)} - \hat{x}_{-\delta}^{(k)}\|_2$$

The gradient is evaluated as

$$\mathcal{G}^{(k)}(p_i) = \frac{d_1^{(k)} - d_2^{(k)}}{2\Delta} \quad \forall i = 1 \dots M \quad (5)$$

$\mathcal{G}$  will have the same dimension as signal with missing samples  $\tilde{x} \in \mathbb{R}^N$ . The missing values of signal is corrected by applying correction.

## Stability and Convergence

Analysis of stability and convergence of proposed method is presented. Stability have a direct dependence on the hyper-parameters and detailed discussion of hyper-parameters is presented in the *section 4*.

**Theorem 1** Let  $x = (x_1, \dots, x_j, \dots, x_n) \in \mathcal{M}$  with  $x(j) \neq 0$  and  $\tilde{x} = (x_1, \dots, \tilde{x}_j, \dots, x_n) \in \mathcal{R}^n$  be a single sample corrupted version of  $x$  such that  $\tilde{x}_j = 0$  or  $\tilde{x}(j) = 0$ . Then if  $\hat{x}^{(k)}$  and  $\hat{x}^{(l)}$  be two recovered versions of  $x$  such that  $\|x - \hat{x}^{(k)}\| \leq \|x - \hat{x}^{(l)}\|$  then the respective gradients defined by (5) will be related as  $\mathcal{G}^{(k)}(j) \leq \mathcal{G}^{(l)}(j)$ .

*Proof* From the definition or projection operator (1) we have  $\|x - \mathcal{P}_{\mathcal{M}}(x)\| = 0$

$$\mathcal{G}^{(k)}(j) = \frac{\|\hat{x}_{+\delta}^{(k)} - \mathcal{P}_{\mathcal{M}}(\hat{x}_{+\delta}^{(k)})\|_2 - \|\hat{x}_{-\delta}^{(k)} - \mathcal{P}_{\mathcal{M}}(\hat{x}_{-\delta}^{(k)})\|_2}{2\Delta}$$

Without the loss of generality, we can assume that  $x_j > 0$ ,  $x_j^{(k)} \leq x_j$  and  $x_j^{(j)} \leq x_j$  then

$$\mathcal{G}^{(k)}(j) \approx \frac{\sqrt{\{(\hat{x}_j^{(k)} + \Delta) - (x_j - \epsilon_1)\}^2} - \sqrt{\{(\hat{x}_j^{(k)} - \Delta) - (x_j - \epsilon_2)\}^2}}{2\Delta}$$

where  $\varepsilon_1 > 0, \varepsilon_2 > 0$  &  $\varepsilon_1 < \varepsilon_2$

$$\mathcal{G}^{(k)}(j) \approx \frac{(\hat{x}_j^{(k)} + \Delta) - (x_j - \varepsilon_1) - (\hat{x}_j^{(k)} - \Delta) + (x_j - \varepsilon_2)}{2\Delta}$$

$$\therefore \mathcal{G}^{(k)}(j) \approx \frac{2\Delta + \varepsilon_1 - \varepsilon_2}{2\Delta}$$

$$\mathcal{G}^{(k)}(j) \approx 1 - \frac{\varepsilon_2 - \varepsilon_1}{2\Delta} \quad (6)$$

Select the parameter  $\Delta$  such that  $\frac{\varepsilon_2 - \varepsilon_1}{2\Delta} \leq 1$ .

Since  $x_j^{(j)} \leq x_j$  and using the definition (6)

$$\mathcal{G}^{(l)}(j) \approx 1 - \frac{\varepsilon_4 - \varepsilon_3}{2\Delta} \text{ with } \varepsilon_1 > 0, \varepsilon_2 > 0 \text{ \& } \varepsilon_3 < \varepsilon_4$$

Since  $\|x - \hat{x}^{(k)}\| \leq \|x - \hat{x}^{(l)}\|$  and using (1) we have,

$$\frac{\varepsilon_4 - \varepsilon_3}{2\Delta} \leq \frac{\varepsilon_2 - \varepsilon_1}{2\Delta} \implies \mathcal{G}^{(k)}(j) \leq \mathcal{G}^{(l)}(j)$$

**Proposition 1** If  $x = (x_1, \dots, x_j, \dots, x_n) \in \mathcal{M}$  then the gradient defined by (5) will be  $\mathcal{G}^{(k)} = (0, 0, \dots, 0)$ .

$$\mathcal{G}^{(k)}(j) = \frac{\|\hat{x}_{+\delta} - \mathcal{P}_{\mathcal{M}}(\hat{x}_{+\delta})\|_2 - \|\hat{x}_{-\delta} - \mathcal{P}_{\mathcal{M}}(\hat{x}_{-\delta})\|_2}{2\Delta}$$

where  $j \in \{1, 2, \dots, n\}$

When  $x \in \mathcal{M}$ , using the definition (1) we have the distances

$$\|\hat{x}_{+\delta} - \mathcal{P}_{\mathcal{M}}(\hat{x}_{+\delta})\|_2 = \|\hat{x}_{-\delta} - \mathcal{P}_{\mathcal{M}}(\hat{x}_{-\delta})\|_2$$

$$\therefore \mathcal{G}^{(k)} = (0, 0, \dots, 0).$$

According *Theorem-1* stability can be achieved, if we choose parameter  $\Delta$  such a way that  $\frac{\varepsilon_2 - \varepsilon_1}{2\Delta} \leq 1$ . Therefore, proper selection of the  $\Delta$  will lead to a stable recovery. It is clear from *Proposition-1* that when the signal  $\hat{x}$  approaches clean signal  $x$  then the gradient  $\mathcal{G}$  approaches zero. Also each estimate update  $\hat{x}^{(k+1)} \leftarrow \hat{x}^{(k)} - \mu \mathcal{G}^{(k)}$  is performed in such a way that  $\|x - \hat{x}^{(k+1)}\|_2 \leq \|x - \hat{x}^{(k)}\|_2$ . Hence the proper selection of  $\Delta$  and  $\mu$  also ensures the convergence of the algorithm.

### Sensitivity of hyper-parameters $\Delta$ and $\mu$ :

Detailed analysis of hyper-parameters  $\Delta$  and  $\mu$  is shown in the figure: 1, 2, 3 and 4 for translated Gaussian pulse recovery. When the analysis is carried out by varying  $\mu$ , the other parameter is kept at  $\Delta = 0.5$ . Similarly when the analysis is carried out by varying  $\Delta$ , the other parameter is kept at  $\mu = 0.5$ . Analysis reveals that increase in  $\mu$  value result in early convergence. Better recovery also can be achieved by increasing value of  $\mu$ . On the other hand, when  $\mu$  is increased beyond unity the algorithm diverges. Algorithms goes unstable when the value  $\mu$  approaches unity. So it recommended to limit the value of  $\mu$  between zero and unity ( $0 < \mu < 1$ ) for better performance. Parameter  $\Delta$  is application specific and shows lesser sensitivity compared to  $\mu$ . It is oblivious from the analysis that the increase in  $\Delta$  guarantee an early recovery and better performance, even if its value increases beyond unity. But the algorithm goes unstable, if it is increased beyond a certain limit. The limit depends on the current value of the signal at the position under consideration. Therefore, it is recommended to limit the value  $0 < \Delta < 1$  for a stable recovery.

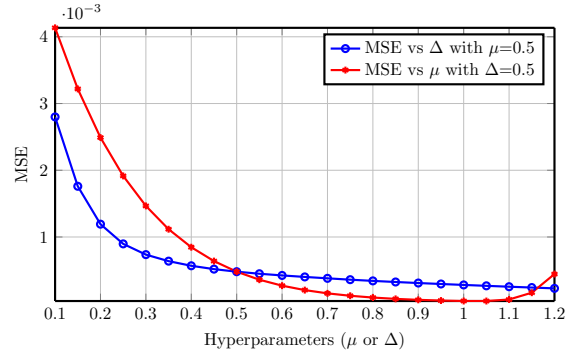

**Fig. 1** Sensitivity of hyper-parameters: Dependence of MSE on  $\mu$  or  $\Delta$  with other parameter fixed at 0.5

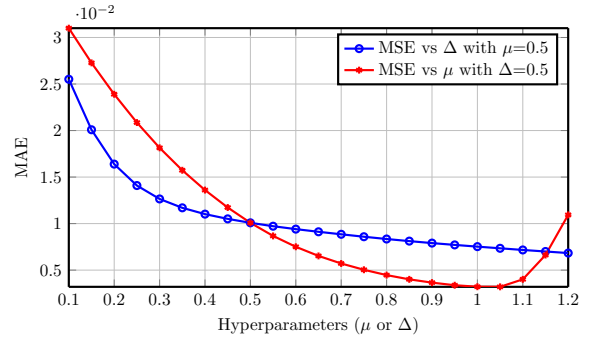

**Fig. 2** Sensitivity of hyper-parameters: Dependence of MAE on  $\mu$  or  $\Delta$  with other parameter fixed at 0.5

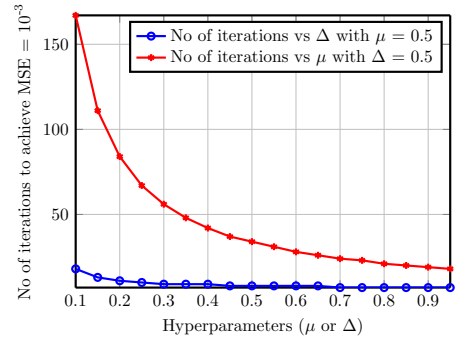

**Fig. 3** Sensitivity of hyper-parameters: Number of iterations to reach a MSE =  $10^{-3}$  vs  $\mu$  or  $\Delta$  with other parameter fixed at 0.65

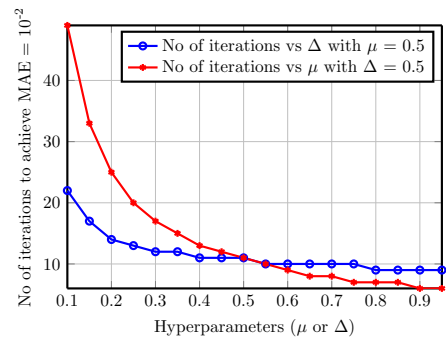

**Fig. 4** Sensitivity of hyper-parameters: Number of iterations to reach a MAE =  $10^{-2}$  vs  $\mu$  or  $\Delta$  with other parameter fixed at 0.5
